# Supplementary material for: Glucose/fructose-based boric acid-bridged in situ generated macrocyclic polymers and their behaviors in capturing dyes
Source: Royal Society of Chemistry journal article supplement (doi:10.1039/d5me00208g), 2026-01-01
Supplement: d5me00208g1.pdf [file d5me00208g1.pdf]

## SUPPORTING INFORMATION

### Glucose/fructose-based boric acid-bridged in-situ generated macrocyclic polymers and their behaviors in capturing dyes

Zhaona Liu<sup>1,2†</sup>, Make Li<sup>2†</sup>, Yangyang Zheng<sup>2†</sup>, Huacheng Zhang<sup>2\*</sup>

<sup>1</sup>Department of Pharmacy, Medical School, Xi'an Peihua University, Xi'an 710125, China

<sup>2</sup>School of Chemical Engineering and Technology, Xi'an Jiaotong University, Xi'an 710049, Shaanxi, China

\*Corresponding author. E-mail: zhanghuacheng@xjtu.edu.cn (H. Zhang)

†Three authors contributed equally to this work.

#### Experimental section about materials and methods

##### 1 Materials

Anhydrous ethanol was purchased from Beijing Macklin Biochemical Company. The G, F (99%), BA (>99.5%), anhydrous ethanol (>99.5%), MB (>98%) and MG (Scheme S1) were all purchased from Macklin (Shanghai, China) without further purification. The RB was purchased from Tianjin Heowns Biochemical Technology Company. Ultrapure water was directly produced in our lab by Ultra-pure water system.

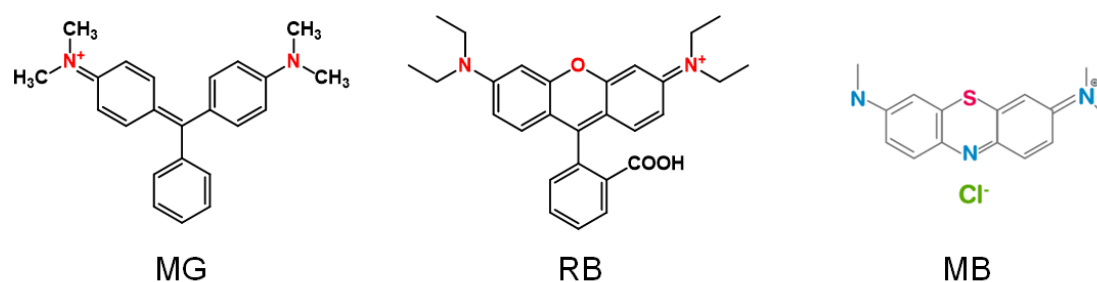

**Scheme S1** Chemical structures of dyes employed in this work.

## 2 Synthesis of BA-G and BA-F

Weigh 5 g of BA and 1 g of G, add them to the beaker, and then heat them to 40 °C with 40 mL of water to dissolve them completely. The beaker was sealed with tinfoil and then reacted in a reaction oven at 200 °C for 4 h. After the reaction, the beaker was soaked with ultrapure water several times and centrifuged until the supernatant was clear in color. The BA-G polymer was obtained by drying the sample.

Similarly, 2 g of BA and 1 g of F were weighed and added to a beaker, and heated to a certain temperature with 40 mL of water to dissolve them completely. The beaker was sealed with tinfoil and the reaction was carried out in a reaction oven at 220 °C for 4 h. After the reaction, the beaker was soaked with ultrapure water several times and centrifuged until the supernatant was clear in color. The BA-F polymer was also obtained after drying the sample.

## 3 Characterization

The morphology of the BA-G and BA-F was observed by scanning electron microscopy (SEM) (MAIA3 LMH, Warrendale, PA, USA). Energy dispersive X-ray spectrometry (EDS, Aztec X-max N-50 mm<sup>2</sup>, Concord, MA, USA) was used to study the elemental distribution in the adsorbent.

The chemical properties of the synthesized materials were analyzed by Fourier transform infrared spectroscopy (FT-IR) (Nicolet iS50) in the range of 4000-400 cm<sup>-1</sup>. X-ray diffraction (XRD) analysis was carried out by using a Shimadzu XRD-6100 and Cu K $\alpha$  radiation (conditions:  $\lambda$  = 0.15406 nm, 100 mA, 40 kV, scanning rate 6° min<sup>-1</sup>) in the range of  $2\theta$  = 10°~80°). Thermogravimetric analysis (TGA) and differential thermogravimetric analysis (DTG) were carried out in the range of 30-800 °C by using a Netzsch STA 449 F3 from Germany with a ramp rate of 10 °C min<sup>-1</sup> to test the stability of the adsorbent under nitrogen gas atmosphere.

The specific surface area of the adsorbent was analyzed by using the N<sub>2</sub> adsorption-desorption method (TriStar II 3020 3.02) through the Brunauer-Emmett-Teller (BET) equation. A certain amount of adsorbent was evacuated

at 120 °C for 8 h before the specific surface area test, and the adsorption and desorption isothermal curves for N<sub>2</sub> were tested using the standard static volume method in a 77 k N<sub>2</sub> cold trap.

X-ray photoelectron spectroscopy (XPS) data were obtained by Thermo Fisher ESCALAB Xi photoelectron (Waltham, MA, USA) by using Al K $\alpha$  excitation. A UV-vis absorption spectrometer (TU-1901 Beijing Pukinje GENERAL Instrument Co., Ltd., Beijing, China) was used to determine the concentration of residual dyes in the supernatant by measuring the standard curves at the maximum wavelengths of each dye.

#### **4 Adsorption experiment**

##### **4.1. Determination of dyes solution standard curve**

Standard solutions (2.0, 4.0, 6.0, 8.0, 10.0, 15.0, 20.0 and 25.0 mg L<sup>-1</sup>) of each dye in the concentration range of 2.0-25.0 mg L<sup>-1</sup> were prepared. The absorbance of the solutions was measured at the maximum wavelength of the dyes. The concentration of the solution (C, mg L<sup>-1</sup>) was taken as the horizontal coordinate, and the absorbance (Abs) was taken as the vertical coordinate to fit the standard curves for each dye as shown in Fig. S1.

##### **4.2. Single adsorption performance studies**

In a 100 mL conical flask, 30 mL of dye solution was added, then 10 mg of adsorbent was added. Then, the top of the flask was sealed with cling film and placed in a gas bath constant temperature oscillator. It was oscillated at a certain temperature at an oscillation rate of 130 r min<sup>-1</sup> until the adsorption reached equilibrium. The subsequent experiments were carried out at pH=7. The concentration of the adsorbed dye was determined by using UV-vis spectra, and the remaining concentration of the solution was determined from the standard curve. The adsorption capacity of the adsorbent for the dye,  $q_e$  (mg g<sup>-1</sup>), and the removal rate, R%, were calculated by Eqs. (1) and (2).[1,2]

$$q_e = \frac{(C_0 - C_e)V}{m} \quad (1)$$

$$R\% = \frac{C_0 - C_e}{C_0} \times 100\% \quad (2)$$

Where  $C_0$  ( $\text{mg L}^{-1}$ ) and  $C_e$  ( $\text{mg L}^{-1}$ ) are the concentration of dyes in the beginning and then at equilibrium time, respectively.  $V$  (L) and  $m$  (g) are the volume of the dyes and the weight of the adsorbent, respectively.

#### 4.3. Single-factor experiments

The effects of the mass ratio of BA to G/F, reaction temperature and reaction time on the adsorption properties of BA-G/F were investigated. The effects of different conditions on the adsorption properties of BA-G were investigated when the mass ratio of BA to G was 5:1, the reaction temperature was 200 °C, and the reaction time was kept at 4 h. When the mass ratio of BA to F was 2:1, the effects of different mass ratios on the adsorption properties of BA-F were investigated at a reaction temperature of 220 °C and a reaction time of 4 h. The results are shown in Fig. S2.

#### 4.4. Recyclability of BA-G and BA-F

Adsorbent performance can usually be evaluated by reusability. Use the previous vibration conditions and stop the adsorption when it has reached equilibrium. After filtering the adsorbent through sand filtration equipment, the adsorbent is washed with an ethanol solution in several soaks, which can wash out the dyes. The adsorbent was then dried to a constant weight and the next repeated adsorption could be continuously performed. The reusability of the adsorbent can be assessed based on the results of the repeated cycles of this experiment.

### 5 Adsorption kinetics

Adsorption kinetics can demonstrate the adsorption process versus time. We used quasi-first-order kinetic models and quasi-second-order kinetic models to analyze the adsorption of BA-G and BA-F on various types of dyes.[3]

$$\log(q_e - q_t) = \log q_e - \frac{K_1 t}{2.303} \quad (3)$$

$$\frac{t}{q_t} = \frac{1}{K_2 q_e^2} + \frac{t}{q_e} \quad (4)$$

$K_1$  ( $\text{min}^{-1}$ ) and  $K_2$  ( $\text{g mg}^{-1} \text{min}^{-1}$ ) are the adsorption rate constants and pseudo-second-order adsorption rate constants, respectively. The  $q_e$  ( $\text{mg g}^{-1}$ ) is the adsorption capacity, and the  $q_t$  ( $\text{mg g}^{-1}$ ) is the occasional adsorption capacity.

## 6 Adsorption isotherm

The equilibrium adsorption results were fitted by using the Langmuir and Freundlich adsorption isotherm model to obtain data related to the maximum adsorption capacity.[4]

$$\frac{C_e}{q_e} = \frac{C_e}{q_m} + \frac{1}{K_L q_m} \quad (5)$$

$$\ln(q_e) = \ln K_F + \frac{1}{n} \ln(C_e) \quad (6)$$

$C_e$  ( $\text{mg L}^{-1}$ ) is the equilibrium concentration,  $q_e$  ( $\text{mg g}^{-1}$ ) is the equilibrium adsorption capacity,  $q_m$  is the maximum adsorption capacity,  $K_F$  and  $n$  are constants of the Freundlich equation, as well as  $K_L$  is constant for the Langmuir equation.

## 7 Adsorption thermodynamics

Adsorption thermodynamics can determine whether the adsorption process is either exothermic or absorptive. It can also determine whether the adsorption process is spontaneous or not.[5,6]

$$K_d = \frac{q_e}{C_e} \quad (7)$$

$$\ln K_d = \frac{\Delta S^0}{R} - \frac{\Delta H^0}{RT} \quad (8)$$

$$\Delta G^0 = \Delta H^0 - T\Delta S^0 \quad (9)$$

$K_d$  ( $\text{L g}^{-1}$ ) is the distribution factor,  $q_e$  ( $\text{mg g}^{-1}$ ) is the equilibrium adsorption capacity,  $C_e$  ( $\text{mg L}^{-1}$ ) is the equilibrium concentration,  $R$  ( $8.314 \text{ J mol}^{-1} \text{K}^{-1}$ ) is

the general gas constants, as well as T (K) is the absolute temperature.

## 8 Theoretical calculations

Theoretical calculations of the adsorption system were carried out by using the DFT method, which can accurately analyze the intermolecular interaction energy. The Gaussian quantum chemistry software was used to optimize the geometry of the constructed polymeric model and calculate the binding energy, charge distribution and orbital interactions with the dye molecules, as well as to elucidate the mechanism of the adsorption process at the molecular level.

The solvent effect of water was first described by using the CPCM implicit solvent model, and to find the optimal adsorption structure of polymers with dyes. One hundred possible complex structures were randomly generated, then performed the search by using the Molclus program, and were optimized for each complex cluster by using the xTB program.[7] After preliminary structure optimization, the cluster with the lowest energy was selected as the most probable adsorption structure and then these selected clusters were optimized. All the above calculations were performed by using ORCA 5.02 program.[8] The adsorption energy of the complex was calculated by the following equation:

$$E_{adsorb} = E_{A+B} - E_A - E_B \quad (10)$$

Where  $E_A$  and  $E_B$  are the energies of the isolated molecules and  $E_{A+B}$  is the total energy of the complex structure.

To further analyze the intermolecular interactions, an independent gradient model (IGM) [9] was carried out by using the Multiwfn program [10] to visually study the weak interactions, and the VMD program [11] was also used to observe the interactions.

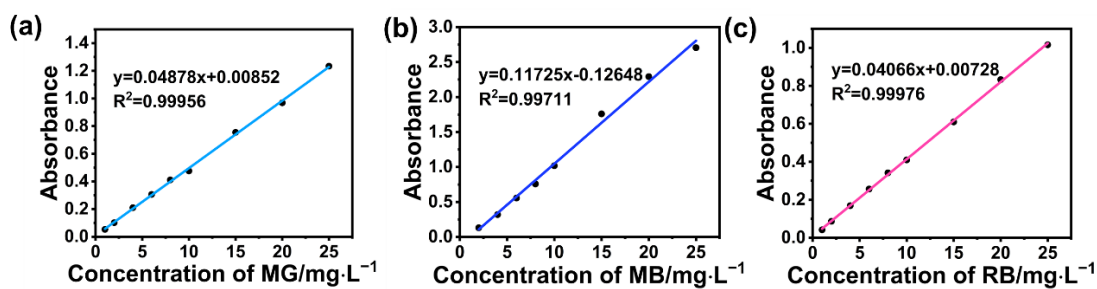

**Fig. S1** The standard curves of MG, MB and RB solution.

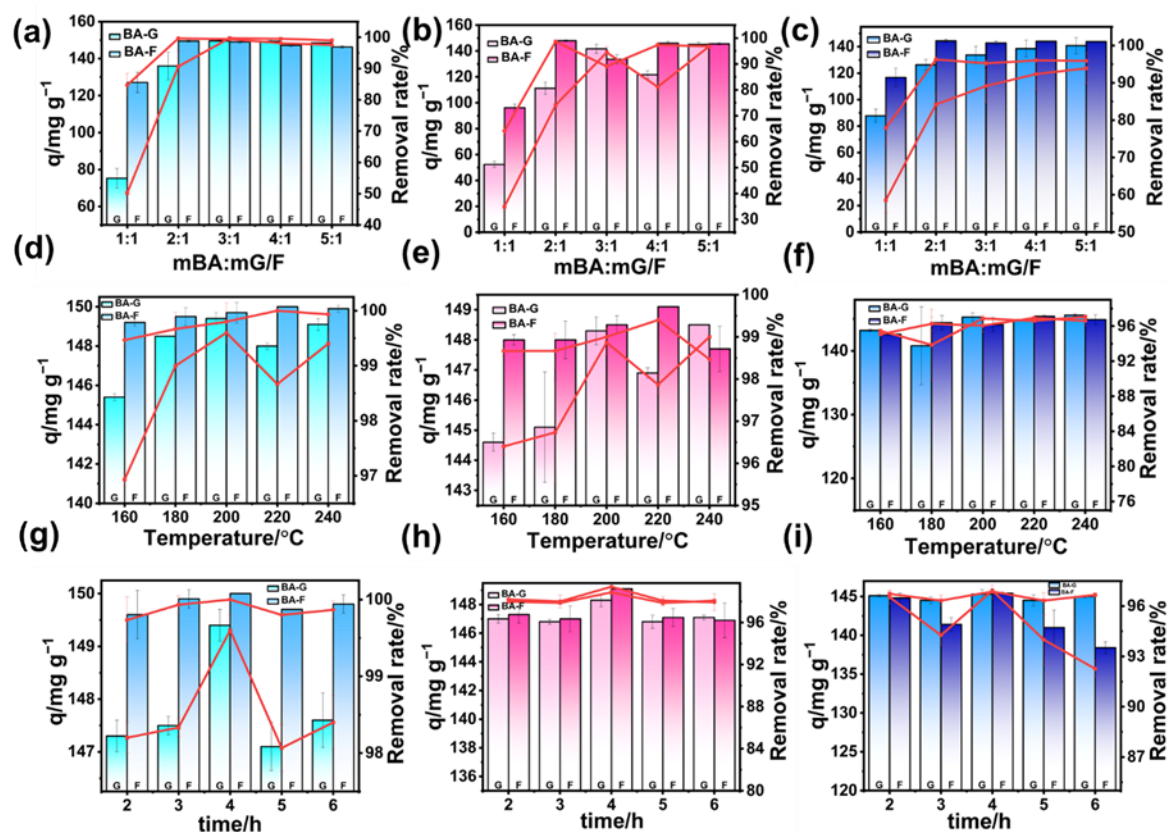

**Fig. S2** Adsorption of MG, RB and MB by BA-G and BA-F under different conditions such as reaction ratios, temperatures and contact time.

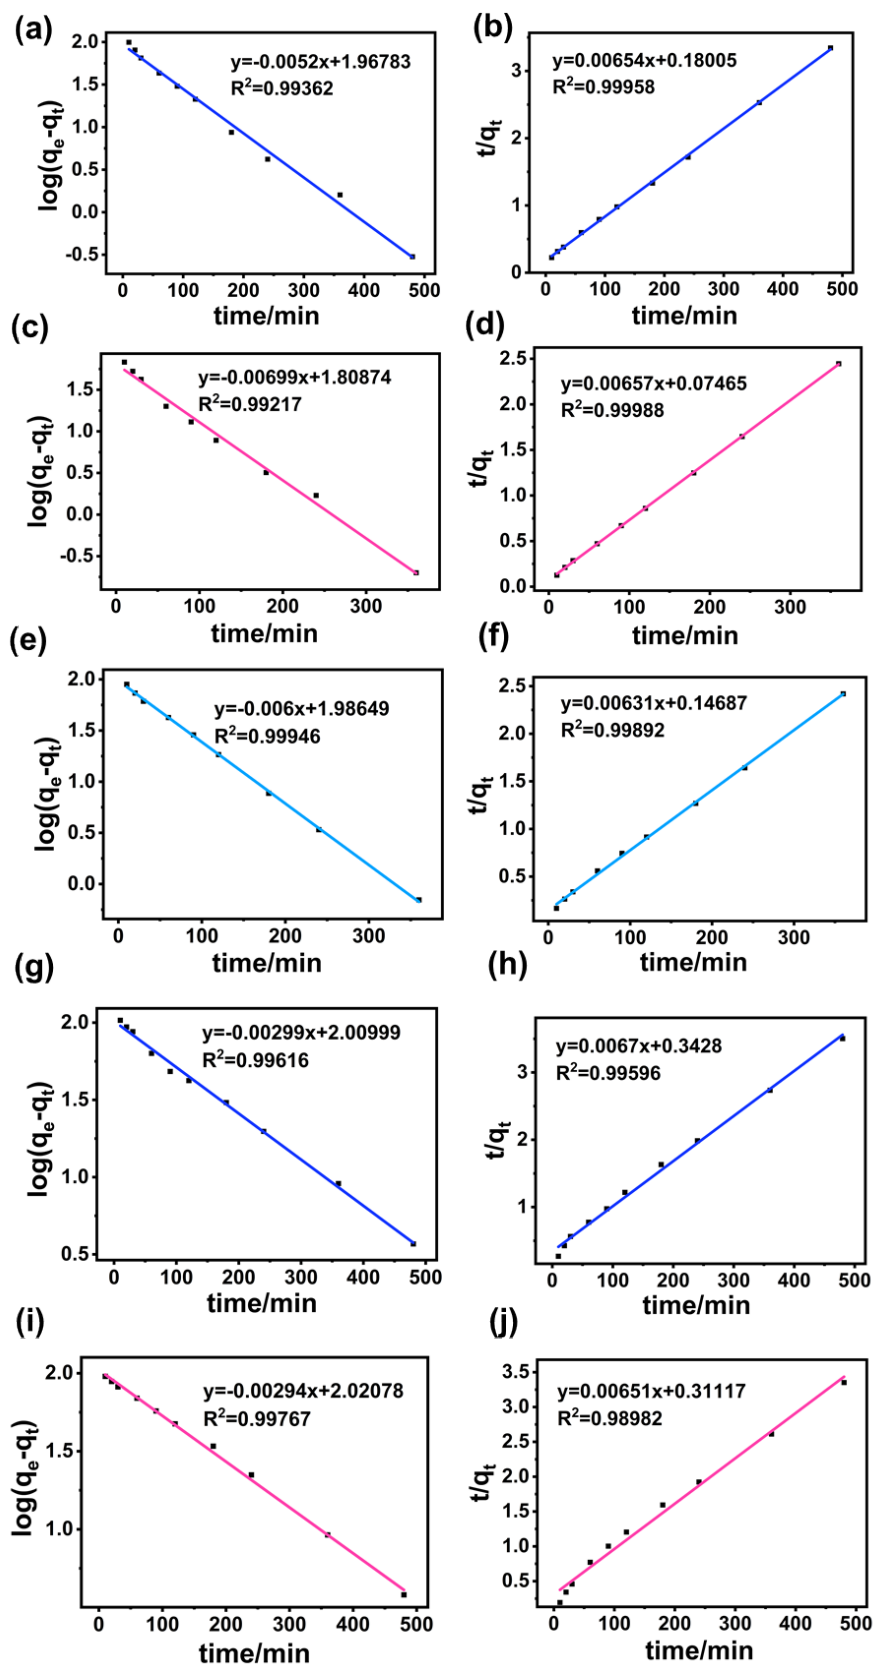

**Fig. S3** Quasi-first and quasi-second order kinetic models for (a-b) BA-G-MB, (c-d) BA-G-RB, (e-f) BA-F-MG, (g-h) BA-F-MB and (i-j) BA-F-RB.

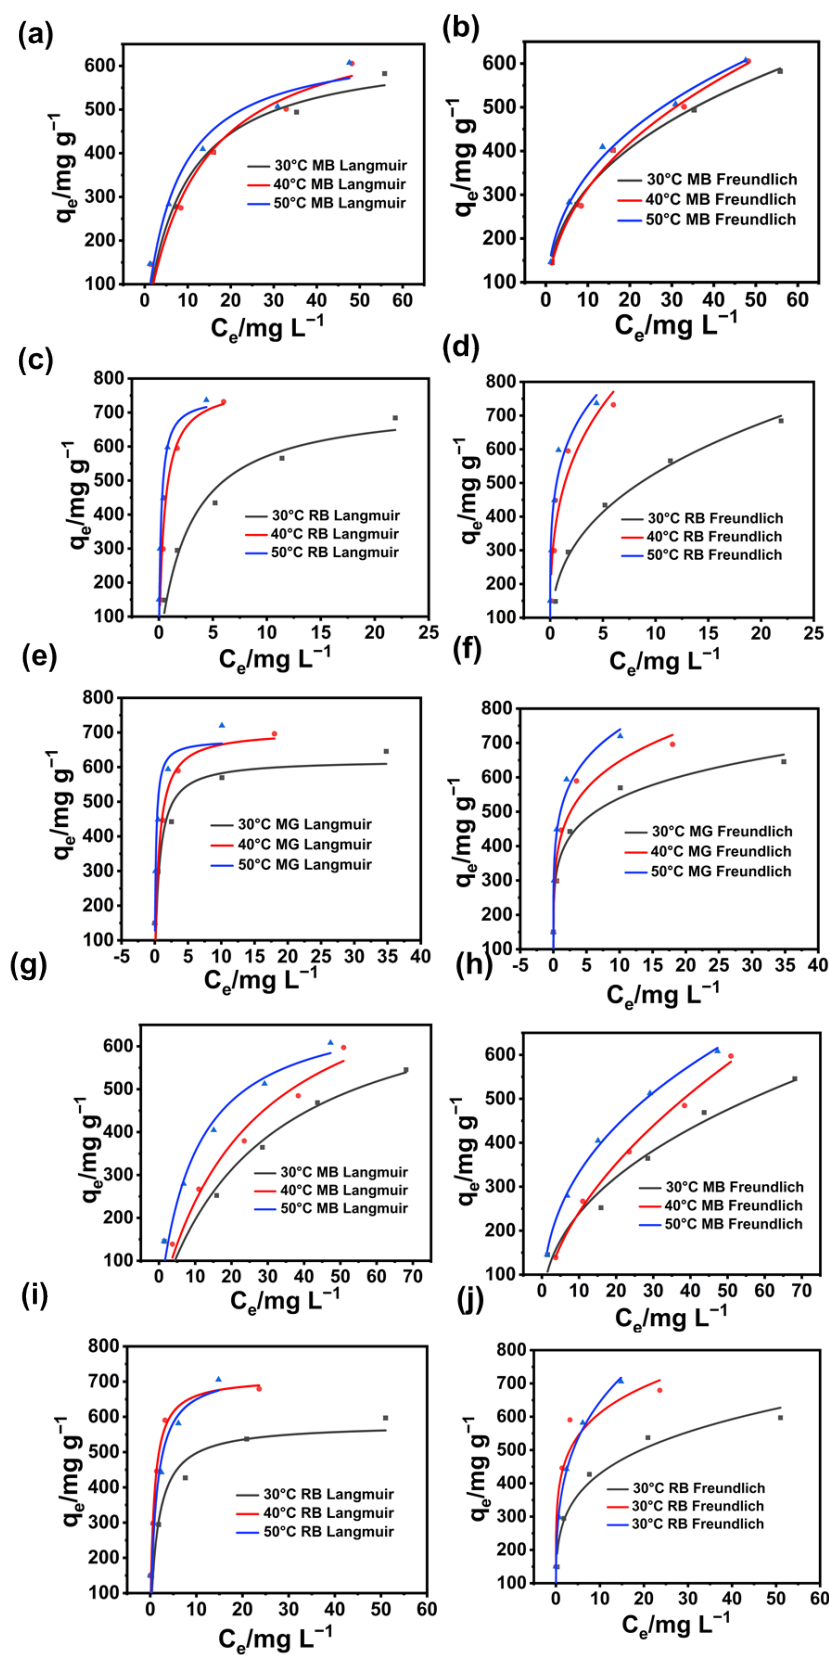

**Fig. S4** Langmuir and Freundlich adsorption isotherm fitting curves for (a-b) BA-G-MB, (c-d) BA-G-RB, (e-f) BA-F-MG, (g-h) BA-F-MB and (i-j) BA-F-RB.

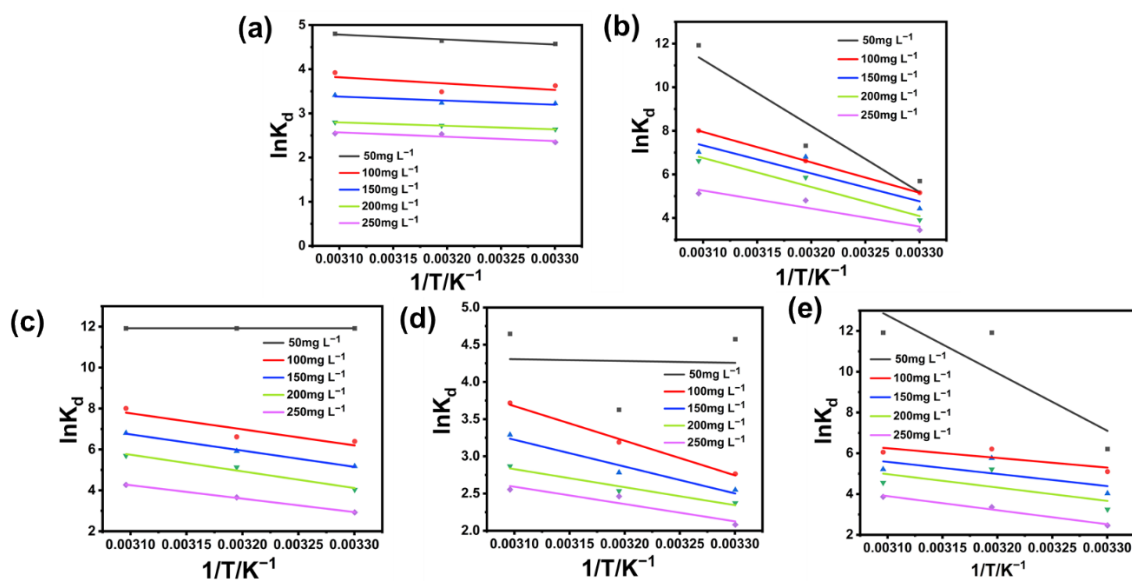

**Fig. S5** Curves of  $\ln K_d$  vs.  $1/T$  for (a) BA-G-MB, (b) BA-G-RB, (c) BA-F-MG, (d) BA-F-MB and (e) BA-F-RB.

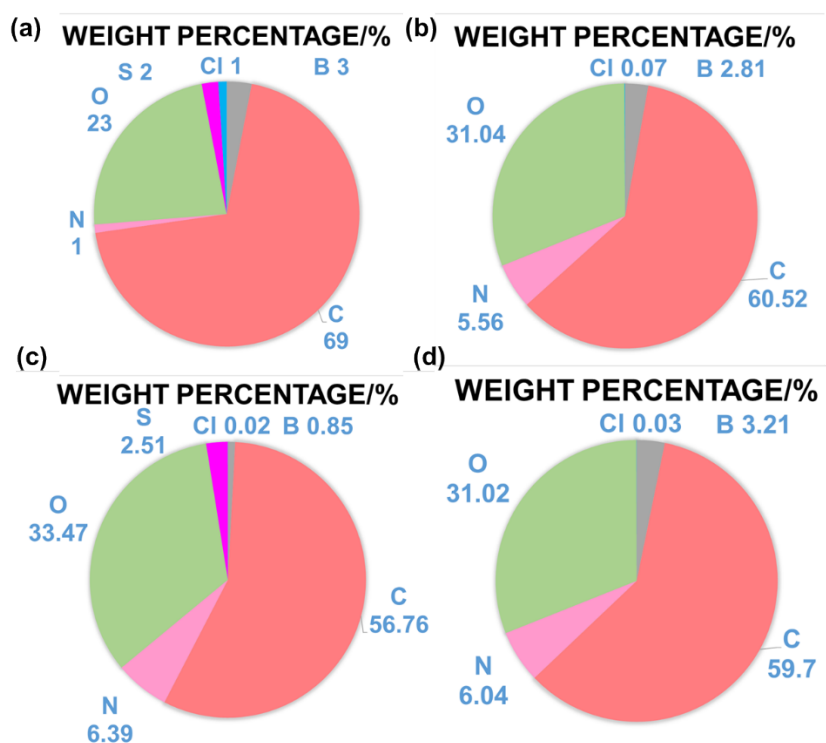

**Fig. S6** EDS energy spectra of (a) BA-G-MB, (b) BA-G-RB, (c) BA-F-MB and (d) BA-F-RB.

**Table S1** Parameters associated with the two kinetic models of BA-G towards

MG.

| Kinetic Model                            | Parameters                              | Value   |
|------------------------------------------|-----------------------------------------|---------|
| BA-G-MG-Quasi-First-Order Kinetic Model  | $K_1/\text{min}^{-1}$                   | 0.016   |
|                                          | $q_{e\text{ cal}}/\text{mg g}^{-1}$     | 41.35   |
|                                          | $R^2$                                   | 0.92376 |
| BA-G-MG-Quasi-Second-Order Kinetic Model | $K_2/\text{g mg}^{-1} \text{ min}^{-1}$ | 0.00082 |
|                                          | $q_{e\text{ cal}}/\text{mg g}^{-1}$     | 153.14  |
|                                          | $R^2$                                   | 0.99982 |

**Table S2** Parameters related to the two kinetic models for various types of BA-G and BA-F towards dyes.

| Kinetic Model                            | Parameters                              | Value   |
|------------------------------------------|-----------------------------------------|---------|
| BA-G-MB-Quasi-First-Order Kinetic Model  | $K_1/\text{min}^{-1}$                   | 0.012   |
|                                          | $q_{e\text{ cal}}/\text{mg g}^{-1}$     | 92.86   |
|                                          | $R^2$                                   | 0.99362 |
| BA-G-MB-Quasi-Second-Order Kinetic Model | $K_2/\text{g mg}^{-1} \text{ min}^{-1}$ | 0.00024 |
|                                          | $q_{e\text{ cal}}/\text{mg g}^{-1}$     | 152.91  |
|                                          | $R^2$                                   | 0.99958 |
| BA-G-RB-Quasi-First-Order Kinetic Model  | $K_1/\text{min}^{-1}$                   | 0.016   |
|                                          | $q_{e\text{ cal}}/\text{mg g}^{-1}$     | 64.38   |
|                                          | $R^2$                                   | 0.99217 |
| BA-G-RB-Quasi-Second-Order Kinetic Model | $K_2/\text{g mg}^{-1} \text{ min}^{-1}$ | 0.00058 |
|                                          | $q_{e\text{ cal}}/\text{mg g}^{-1}$     | 152.21  |
|                                          | $R^2$                                   | 0.99988 |
| BA-F-MG-Quasi-First-Order Kinetic Model  | $K_1/\text{min}^{-1}$                   | 0.014   |
|                                          | $q_{e\text{ cal}}/\text{mg g}^{-1}$     | 96.94   |
|                                          | $R^2$                                   | 0.99946 |

|                                         |                                          |         |
|-----------------------------------------|------------------------------------------|---------|
|                                         | $K_2/ \text{g mg}^{-1} \text{ min}^{-1}$ | 0.00027 |
| BA-F-MG -Quasi-Second-Order Kinetic     | $q_{e \text{ cal}}/\text{mg g}^{-1}$     | 158.48  |
| Model                                   | $R^2$                                    | 0.99892 |
|                                         | $K_1/\text{min}^{-1}$                    | 0.0069  |
| BA-F-MB-Quasi-First-Order Kinetic Model | $q_{e \text{ cal}}/\text{mg g}^{-1}$     | 102.33  |
|                                         | $R^2$                                    | 0.99616 |
|                                         | $K_2/ \text{g mg}^{-1} \text{ min}^{-1}$ | 0.00013 |
| BA-F-MB-Quasi-Second-Order Kinetic      | $q_{e \text{ cal}}/\text{mg g}^{-1}$     | 149.25  |
| Model                                   | $R^2$                                    | 0.99596 |
|                                         | $K_1/\text{min}^{-1}$                    | 0.0068  |
| BA-F-RB-Quasi-First-Order Kinetic Model | $q_{e \text{ cal}}/\text{mg g}^{-1}$     | 104.90  |
|                                         | $R^2$                                    | 0.99767 |
|                                         | $K_2/ \text{g mg}^{-1} \text{ min}^{-1}$ | 0.00014 |
| BA-F-RB-Quasi-Second-Order Kinetic      | $q_{e \text{ cal}}/\text{mg g}^{-1}$     | 153.61  |
| Model                                   | $R^2$                                    | 0.98982 |

**Table S3** Parameters related to two adsorption isotherm models of BA-G towards MG.

| Temperatur | Langmuir                          |                                     |         | Freundlich |                        |         |
|------------|-----------------------------------|-------------------------------------|---------|------------|------------------------|---------|
| e/°C       |                                   |                                     |         |            |                        |         |
|            | $q_{\text{max}}/\text{mg g}^{-1}$ | $K_L/\text{L} \cdot \text{mg}^{-1}$ | $R^2$   | $1/n$      | $K_F/\text{L mg}^{-1}$ | $R^2$   |
| BA-G-30-MG | 694.02                            | 1.08                                | 0.98807 | 0.24       | 338.78                 | 0.90709 |
| BA-G-40-MG | 674.17                            | 5.93                                | 0.92385 | 0.15       | 491.07                 | 0.84483 |

|          |        |      |       |    |        |       |
|----------|--------|------|-------|----|--------|-------|
| BA-G-50- | 756.91 | 6.79 | 0.972 | 0. | 610.90 | 0.481 |
| MG       |        |      | 17    | 17 |        | 34    |

**Table S4** Parameters related to two adsorption isotherm models for various types of BA-G and BA-F towards dyes.

| Temperatur<br>e /°C | Langmuir                               |                                   |             | Freundlich |                                   |             |
|---------------------|----------------------------------------|-----------------------------------|-------------|------------|-----------------------------------|-------------|
|                     | $q_{\max}/\text{mg}\cdot\text{g}^{-1}$ | $K_L/\text{L}\cdot\text{mg}^{-1}$ | $R^2$       | $1/n$      | $K_F/\text{L}\cdot\text{mg}^{-1}$ | $R^2$       |
|                     | 1                                      | 1                                 |             |            | 1                                 |             |
| BA-G-30-<br>MB      | 644.54                                 | 0.11                              | 0.9644<br>3 | 0.3<br>6   | 137.72                            | 0.9914<br>6 |
| BA-G-40-<br>MB      | 723.77                                 | 0.082                             | 0.9467<br>7 | 0.4<br>1   | 122.55                            | 0.9920<br>5 |
| BA-G-50-<br>MB      | 657.02                                 | 0.14                              | 0.9612<br>8 | 0.3<br>6   | 151.72                            | 0.9928<br>3 |
| BA-G-30-<br>RB      | 732.06                                 | 0.36                              | 0.9712<br>7 | 0.3<br>6   | 232.98                            | 0.9894<br>8 |
| BA-G-40-<br>RB      | 784.50                                 | 2.04                              | 0.9711<br>8 | 0.3<br>0   | 452.72                            | 0.9042      |
| BA-G-50-<br>RB      | 748.50                                 | 5.04                              | 0.9486<br>8 | 0.2<br>1   | 555.34                            | 0.8641<br>2 |
| BA-F-30-<br>MG      | 621.03                                 | 1.50                              | 0.9307<br>9 | 0.1<br>7   | 365.72                            | 0.8468<br>1 |
| BA-F-40-<br>MG      | 706.15                                 | 1.61                              | 0.9873<br>4 | 0.1<br>9   | 417.19                            | 0.8451<br>7 |
| BA-F-50-            | 679.64                                 | 5.73                              | 0.9049      | 0.1        | 494.04                            | 0.8770      |

|            |        |       |        |     |        |        |
|------------|--------|-------|--------|-----|--------|--------|
| MG         |        |       | 3      | 7   |        | 8      |
| BA-F-30-MB | 771.97 | 0.034 | 0.8810 | 0.4 | 89.75  | 0.9656 |
|            |        |       | 5      | 3   |        | 4      |
| BA-F-40-MB | 852.03 | 0.039 | 0.9727 | 0.5 | 69.56  | 0.9951 |
|            |        |       |        | 4   |        | 2      |
| BA-F-50-MB | 707.24 | 0.10  | 0.9649 | 0.4 | 133.59 | 0.9975 |
|            |        |       | 2      | 0   |        | 3      |
| BA-F-30-RB | 579.90 | 0.60  | 0.9447 | 0.2 | 250.48 | 0.9699 |
|            |        |       | 5      | 3   |        | 7      |
| BA-F-40-RB | 712.94 | 1.24  | 0.9925 | 0.1 | 408.99 | 0.7968 |
|            |        |       | 9      | 7   |        | 2      |
| BA-F-50-RB | 733.53 | 0.78  | 0.9538 | 0.2 | 344.23 | 0.8808 |
|            |        |       | 6      | 7   |        | 4      |

**Table S5** Thermodynamic correlation parameters of BA-G towards MG.

| MG                               |               |                                 |                                 |                                              |
|----------------------------------|---------------|---------------------------------|---------------------------------|----------------------------------------------|
| concentration/mg L <sup>-1</sup> | Temperature/K | $\Delta G^0/\text{kJ mol}^{-1}$ | $\Delta H^0/\text{kJ mol}^{-1}$ | $\Delta S^0/\text{J mol}^{-1} \text{K}^{-1}$ |
|                                  | 303           | -18.7523                        | 217.94                          | 781.17                                       |
| BA-G-50-MG                       | 313           | -26.564                         |                                 |                                              |
|                                  | 323           | -34.3758                        |                                 |                                              |
|                                  | 303           | -13.7999                        | 271.10                          | 940.26                                       |
| BA-G-100-MG                      | 313           | -23.2025                        |                                 |                                              |
|                                  | 323           | -32.6052                        |                                 |                                              |
|                                  | 303           | -14.393                         | 82.38                           | 319.39                                       |
| BA-G-                            | 313           | -17.5869                        |                                 |                                              |

|        |     |          |       |        |
|--------|-----|----------|-------|--------|
| 150-MG | 323 | -20.7808 |       |        |
|        | 303 | -11.6683 | 89.40 | 333.55 |
| BA-G-  | 313 | -15.0038 |       |        |
| 200-MG | 323 | -18.3392 |       |        |
|        | 303 | -8.06487 | 81.46 | 295.46 |
| BA-G-  | 313 | -11.0194 |       |        |
| 250-MG | 323 | -13.974  |       |        |

**Table S6** Thermodynamic correlation parameters of BA-G and BA-F towards dyes.

| The Concentration<br>of dyes/mg L <sup>-1</sup> | Temperature<br>/K | $\Delta G^0/\text{kJ mol}^{-1}$ | $\Delta H^0/\text{kJ mol}^{-1}$ | $\Delta S^0/\text{J mol}^{-1} \text{K}^{-1}$ |
|-------------------------------------------------|-------------------|---------------------------------|---------------------------------|----------------------------------------------|
|                                                 | 303               | -11.4859                        | 9.29                            | 68.56                                        |
| BA-G-50-MB                                      | 313               | -12.1716                        |                                 |                                              |
|                                                 | 323               | -12.8572                        |                                 |                                              |
|                                                 | 303               | -8.89619                        | 11.87                           | 68.54                                        |
| BA-G-100-MB                                     | 313               | -9.58154                        |                                 |                                              |
|                                                 | 323               | -10.2669                        |                                 |                                              |
|                                                 | 303               | -8.05381                        | 7.59                            | 51.64                                        |
| BA-G-150-MB                                     | 313               | -8.57019                        |                                 |                                              |
|                                                 | 323               | -9.08656                        |                                 |                                              |
|                                                 | 303               | -6.64974                        | 6.49                            | 43.37                                        |
| BA-G-200-MB                                     | 313               | -7.08343                        |                                 |                                              |
|                                                 | 323               | -7.51712                        |                                 |                                              |
|                                                 | 303               | -5.9754                         | 8.22                            | 46.85                                        |
| BA-G-250-MB                                     | 313               | -6.44388                        |                                 |                                              |
|                                                 | 323               | -6.91236                        |                                 |                                              |
|                                                 | 303               | -13.0478                        | 251.86                          | 874.29                                       |

|             |     |          |        |        |
|-------------|-----|----------|--------|--------|
| BA-G-50-RB  | 313 | -21.7907 |        |        |
|             | 323 | -30.5337 |        |        |
|             | 303 | -12.9805 | 115.91 | 425.40 |
| BA-G-100-RB | 313 | -17.2345 |        |        |
|             | 323 | -21.4884 |        |        |
|             | 303 | -11.9878 | 106.57 | 391.30 |
| BA-G-150-RB | 313 | -15.9007 |        |        |
|             | 323 | -19.8137 |        |        |
|             | 303 | -10.2866 | 110.79 | 399.60 |
| BA-G-200-RB | 313 | -14.2826 |        |        |
|             | 323 | -18.2786 |        |        |
|             | 303 | -9.07363 | 68.73  | 256.78 |
| BA-G-250-RB | 313 | -11.6414 |        |        |
|             | 323 | -14.2092 |        |        |
|             | 303 | -25.1288 | 94.65  | 395.31 |
| BA-F-50-MG  | 313 | -29.0819 |        |        |
|             | 323 | -33.0351 |        |        |
|             | 303 | -15.6078 | 65.11  | 266.41 |
| BA-F-100-MG | 313 | -18.2719 |        |        |
|             | 323 | -20.936  |        |        |
|             | 303 | -12.9626 | 65.94  | 260.42 |
| BA-F-150-MG | 313 | -15.5668 |        |        |
|             | 323 | -18.171  |        |        |
|             | 303 | -10.3511 | 67.79  | 257.88 |
| BA-F-200-MG | 313 | -12.9299 |        |        |
|             | 323 | -15.5088 |        |        |
|             | 303 | -7.38985 | 54.78  | 205.20 |
| BA-F-250-MG | 313 | -9.44181 |        |        |

|             |     |          |        |        |
|-------------|-----|----------|--------|--------|
|             | 323 | -11.4938 |        |        |
|             | 303 | -10.7231 | 2.04   | 42.11  |
| BA-F-50-MB  | 313 | -11.1443 |        |        |
|             | 323 | -11.5654 |        |        |
|             | 303 | -6.90985 | 38.68  | 150.46 |
| BA-F-100-MB | 313 | -8.41445 |        |        |
|             | 323 | -9.91905 |        |        |
|             | 303 | -6.29967 | 29.97  | 119.70 |
| BA-F-150-MB | 313 | -7.49671 |        |        |
|             | 323 | -8.69375 |        |        |
|             | 303 | -5.90226 | 20.09  | 85.80  |
| BA-F-200-MB | 313 | -6.76026 |        |        |
|             | 323 | -7.61825 |        |        |
|             | 303 | -5.35434 | 19.35  | 81.54  |
| BA-F-250-MB | 313 | -6.16973 |        |        |
|             | 323 | -6.98513 |        |        |
|             | 303 | -17.8861 | 234.69 | 833.59 |
| BA-F-50-RB  | 313 | -26.222  |        |        |
|             | 323 | -34.5579 |        |        |
|             | 303 | -13.3441 | 39.41  | 174.12 |
| BA-F-100-RB | 313 | -15.0853 |        |        |
|             | 323 | -16.8264 |        |        |
|             | 303 | -11.0609 | 49.33  | 199.30 |
| BA-F-150-RB | 313 | -13.0538 |        |        |
|             | 323 | -15.0468 |        |        |
|             | 303 | -9.23106 | 54.45  | 210.18 |
| BA-F-200-RB | 313 | -11.3328 |        |        |
|             | 323 | -13.4346 |        |        |

|             |     |          |       |        |
|-------------|-----|----------|-------|--------|
|             | 303 | -6.33951 | 57.29 | 209.99 |
| BA-F-250-RB | 313 | -8.43934 |       |        |
|             | 323 | -10.5392 |       |        |

---

## REFERENCES

- [1] Ferreira D C M, Dos S T C, Coimbra J S D R, et al. Chitosan/carboxymethylcellulose polyelectrolyte complexes (PECs) are an effective material for dye and heavy metal adsorption from water. *Carbohydrate Polymers*, 2023, 315: 120977.
- [2] Gao M, Xu D, Gao Y, et al. Mussel-inspired triple bionic adsorbent: Facile preparation of layered double hydroxide@polydopamine@metal-polyphenol networks and their selective adsorption of dyes in single and binary systems. *Journal of Hazardous Materials*, 2021, 420: 126609.
- [3] Jing X R, Wang Y Y, Liu W J, et al. Enhanced adsorption performance of tetracycline in aqueous solutions by methanol-modified biochar. *Chemical Engineering Journal*, 2014, 248: 168-174.
- [4] Zhang G, Lou X Y, Li M H, et al. A pillar[5]arene-based crosslinked polymer material for selective adsorption of organic dyes. *Dyes and Pigments*, 2022, 206: 110576.
- [5] Qin Y, Chai B, Sun Y, et al. Amino-functionalized cellulose composite for efficient simultaneous adsorption of tetracycline and copper ions: Performance, mechanism and DFT study. *Carbohydrate Polymers*, 2024, 332: 121935.
- [6] Kumar A S K, Warchol J, Matusik J, et al. Heavy metal and organic dye removal via a hybrid porous hexagonal boron nitride-based magnetic aerogel. *npj Clean Water*, 2022, 5 (1):24.
- [7] Bannwarth C, Caldeweyher E, Ehlert S, et al. Extended tight-binding quantum chemistry methods. *WIREs Computational Molecular Science*, 2021, 11: e1493.
- [8] Neese F. The ORCA program system. *WIREs Computational Molecular Science*, 2012, 2: 73-78.

- [9] Lefebvre C, Khartabil H, Boisson J C, et al. The independent gradient model: A new approach for probing strong and weak interactions in molecules from wave function calculations. *ChemPhysChem*, 2018, 19, 724.
- [10] Lu T, Chen F. Multiwfn: A multifunctional wavefunction analyzer. *Journal of Computational Chemistry*, 2012 33: 580-592.
- [11] William H, Andrew D, Klaus S. VMD: Visual molecular dynamics. *Journal of Molecular Graphics*, 1996, 14: 33-38.
